# Supplementary material for: Open access repository-scale propagated nearest neighbor suspect spectral library for untargeted metabolomics
Source: PubMed Central journal article supplement (PMC10733301; doi:10.1038/s41467-023-44035-y), 2023-12-20
Supplement: 41467_2023_44035_MOESM3_ESM.pdf [file 41467_2023_44035_MOESM3_ESM.pdf]

## **Description of Additional Supplementary Files:**

**Supplementary Data 1:** Dataset and file frequency of unique observed suspects

**Supplementary Data 2:** Frequency of unique observed delta masses and their putative explanations

**Supplementary Data 3:** Curated list of delta mass interpretations
